# Supplementary material
Source: PubMed Central journal article supplement (PMC5395125)
Supplement: 2016_152926-Disclosures_and_Contributions.pdf [file 2016_152926-Disclosures_and_Contributions.pdf]

Haematologica  
HAEMATOL/2016/152926  
Version 4

The central nervous system microenvironment influences the leukemia transcriptome and enhances leukemia chemo-resistance

Jeffrey S. Gaynes, Leslie M. Jonart, Edward A. Zamora, Jordan A. Naumann, Nathan P. Gossai, and Peter M. Gordon

Disclosures: Peter Gordon: NIH 5K08CA154782-02, Hyundai Hope on Wheels New Investigator Award, Timothy O'Connell Foundation

Contributions: Conception and design: PMG Development of methodology: PMG, EAZ Acquisition of data: JSG, LMJ, PMG, JAN Analysis and interpretation of data: JSG, LMJ, NPG, JAN, PMG Writing, review and/or revision of the manuscript: JSG, NPG, PMG. All authors revised the manuscript.
